# Supplementary material for: Distribution of Embryonic Stem Cell-Derived Mesenchymal Stem Cells after Intravenous Infusion in Hypoxic–Ischemic Encephalopathy
Source: MDPI journal article supplement (doi:10.3390/life13010227), 2023-01-13

Supine position image - Normal

0hr

1hr

1 day

7 day

14 day

Nor1

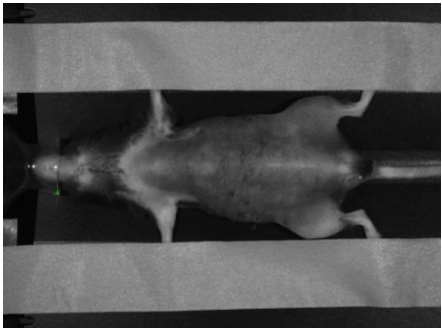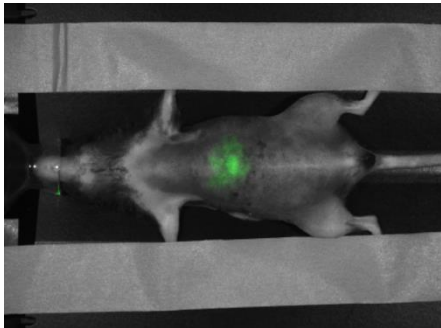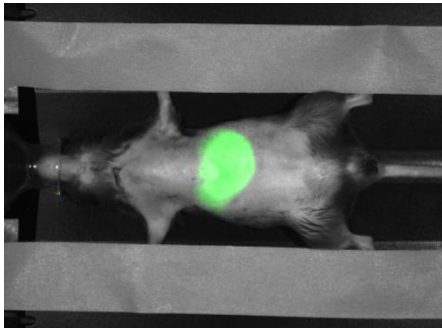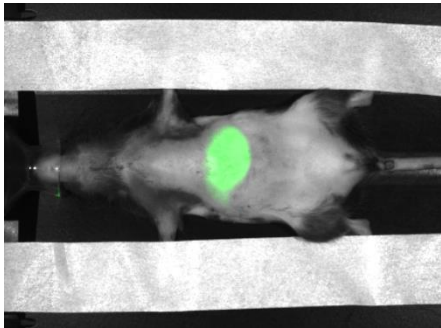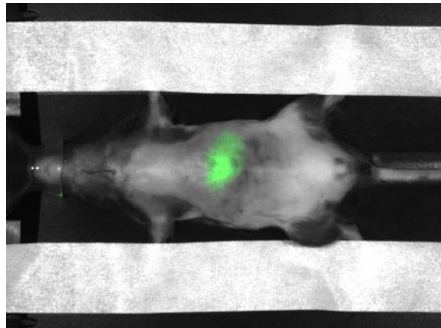

Nor2

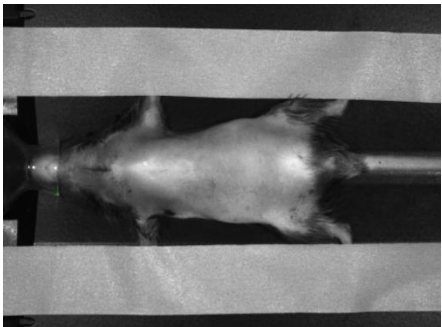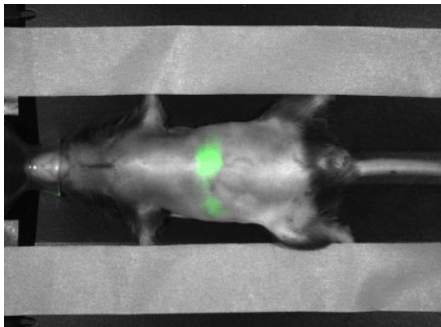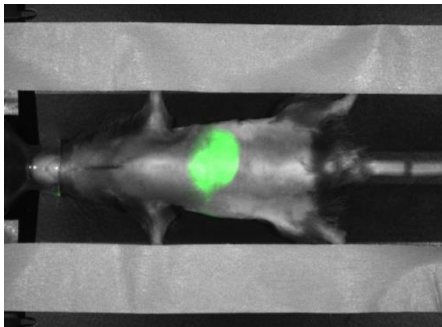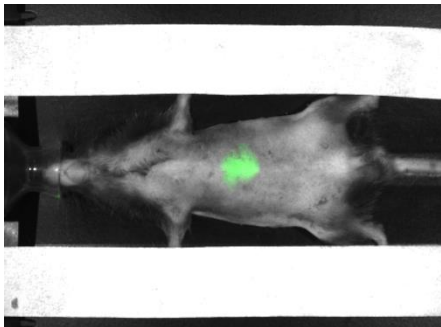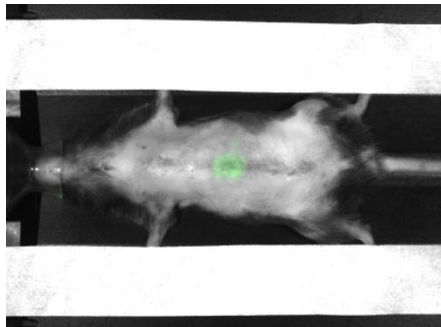

Nor3

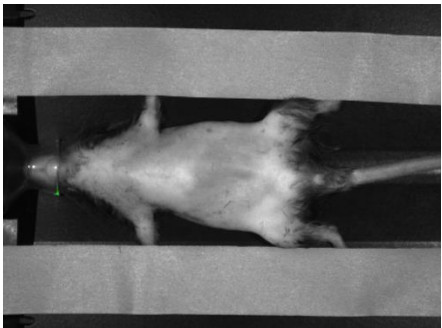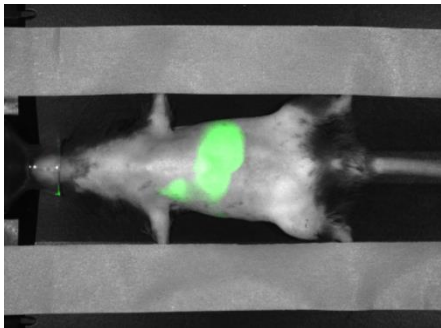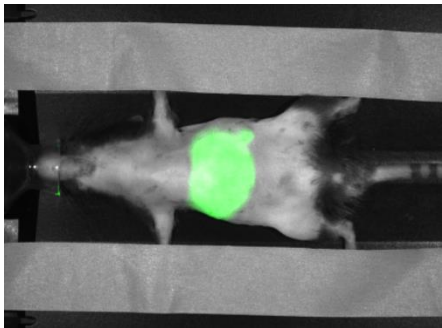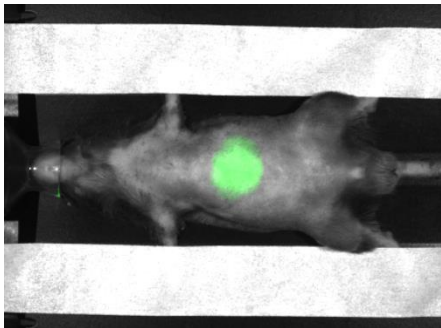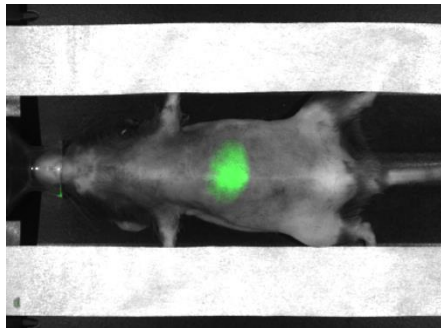

Prone position image - Normal

0hr

1hr

1 day

7 day

14 day

Nor1

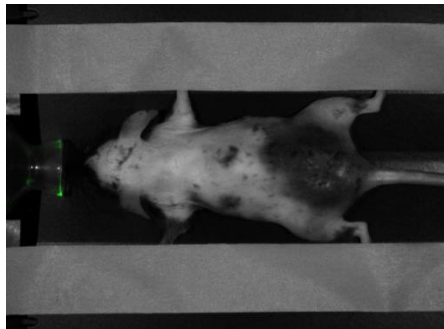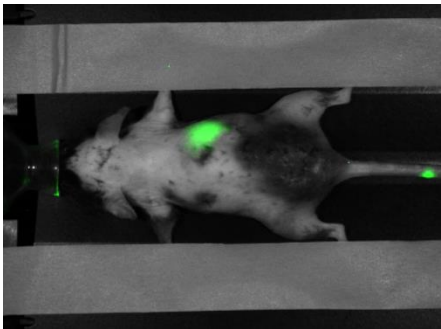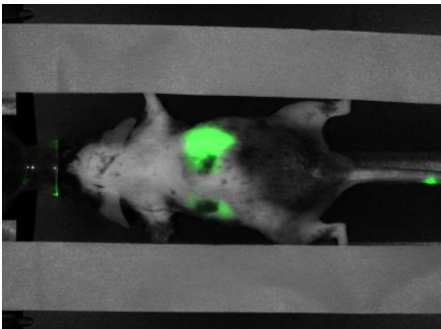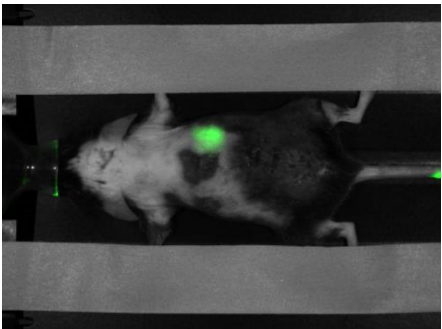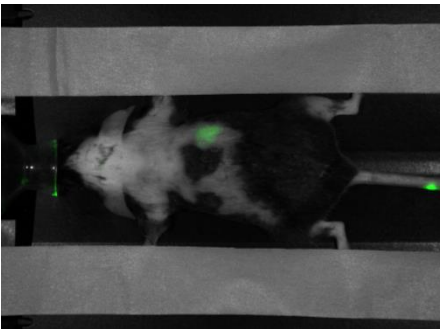

Nor2

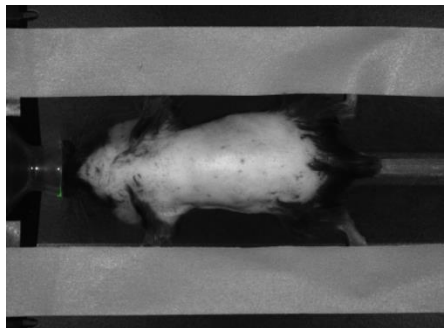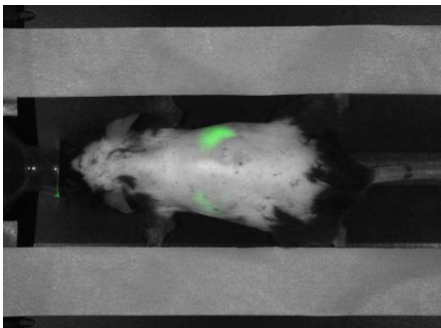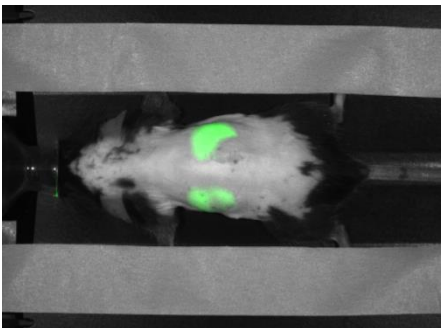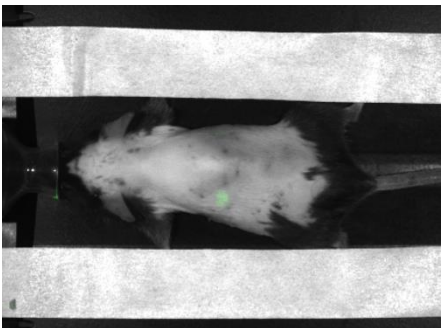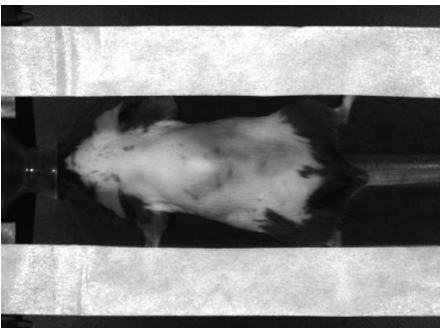

Nor3

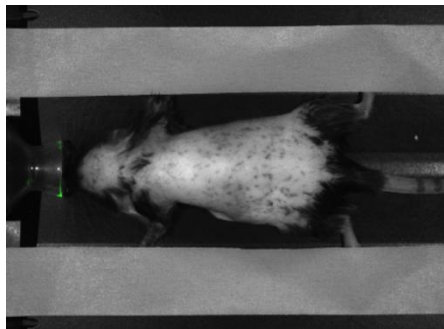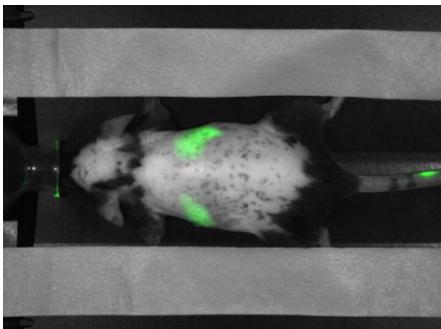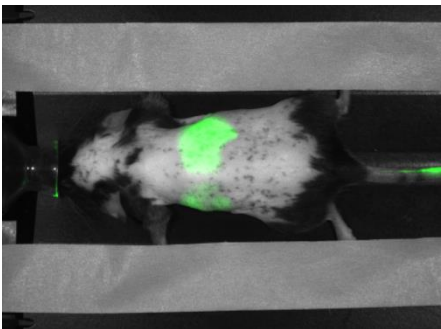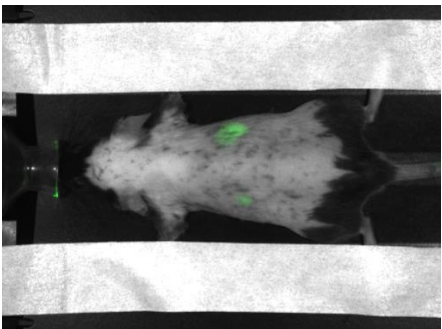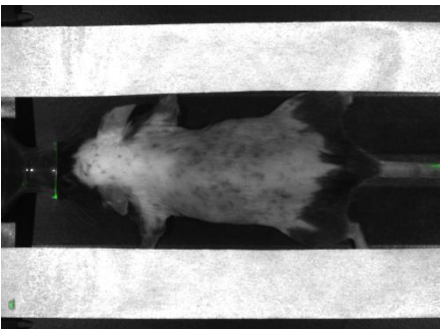





Supine position image - HIE

0hr

1hr

1 day

7 day

14 day

HIE1

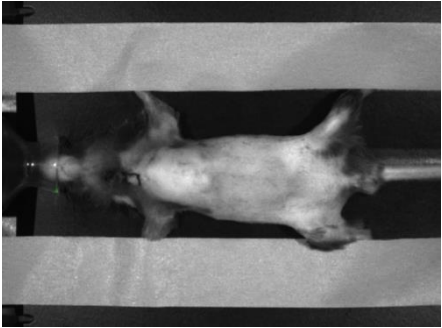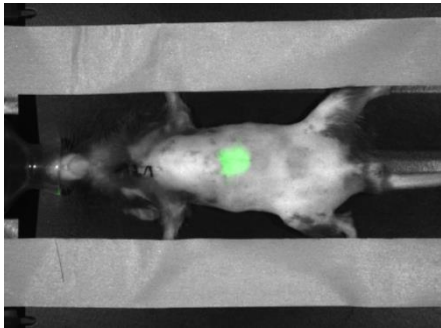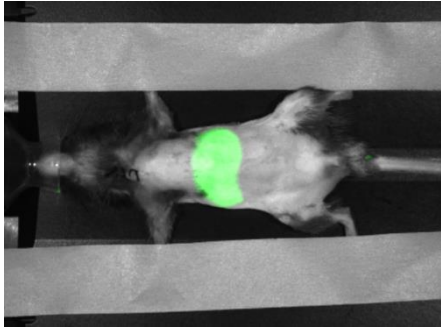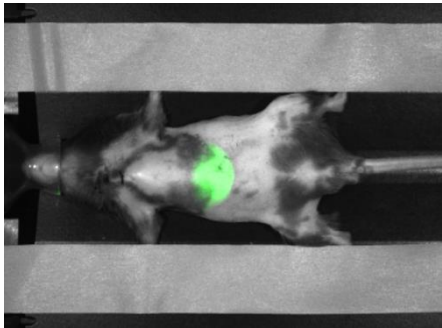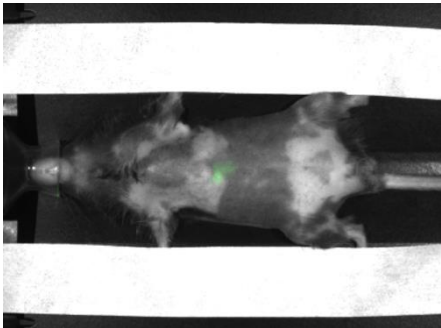

HIE2

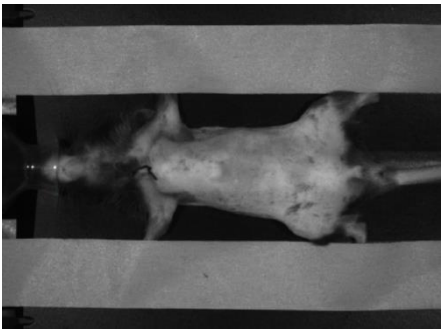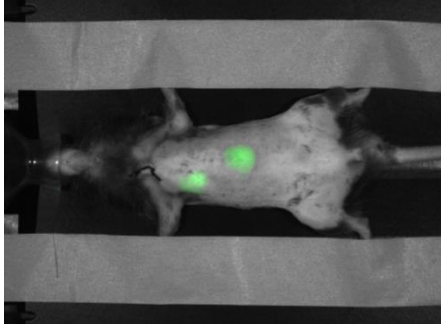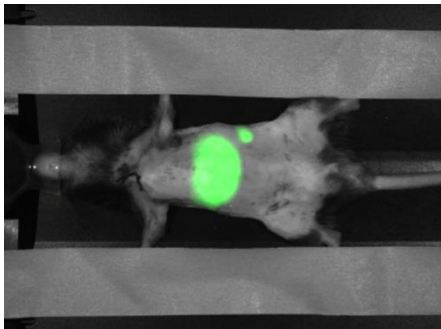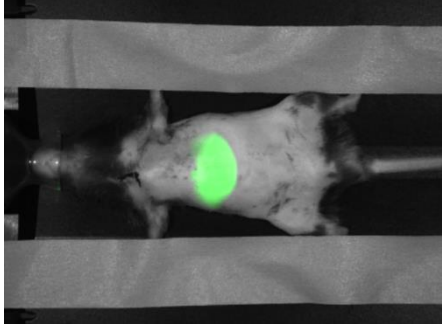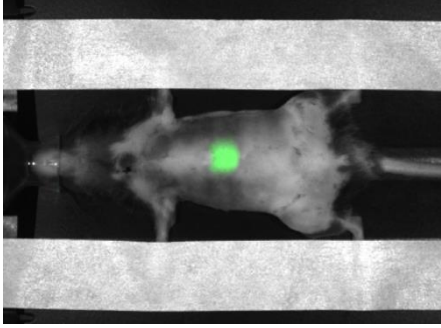

HIE3

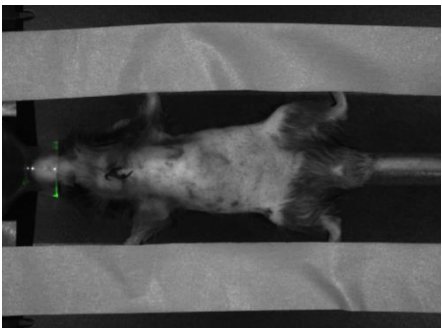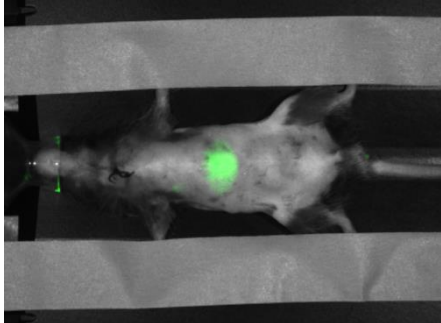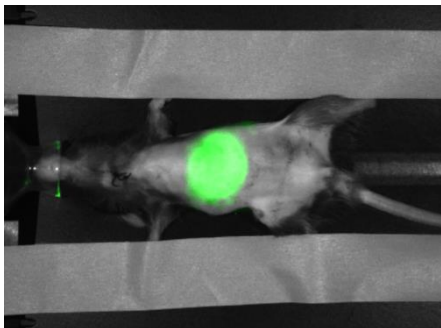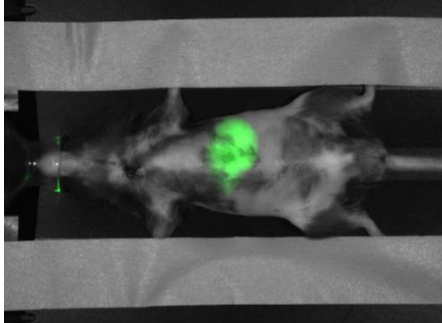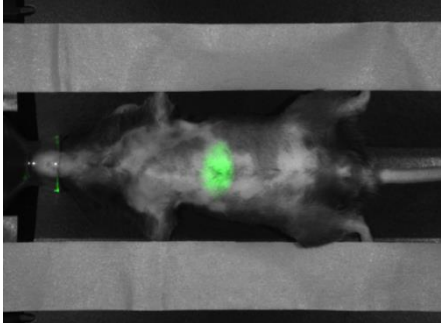

Prone position image - HIE

0hr

1hr

1 day

7 day

14 day

HIE1

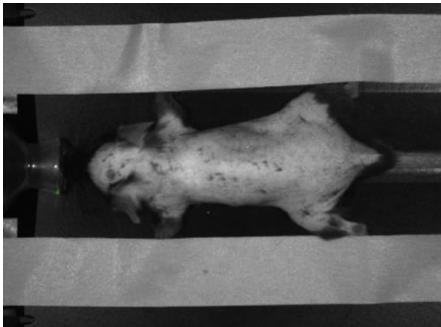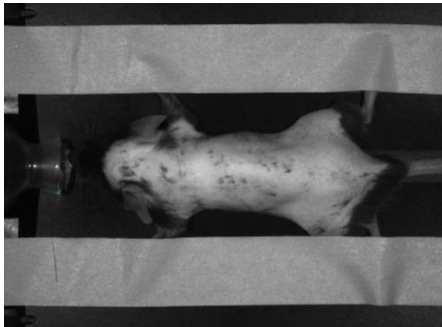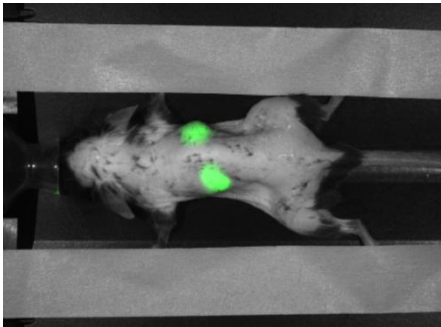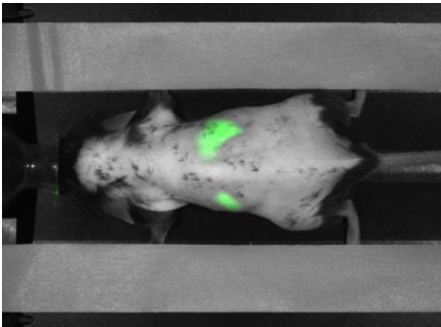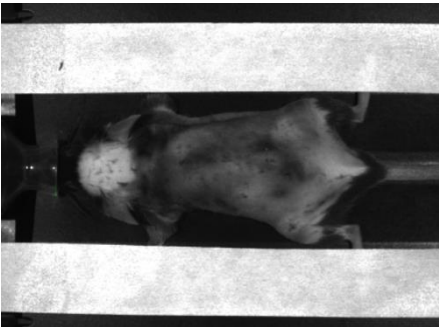

HIE2

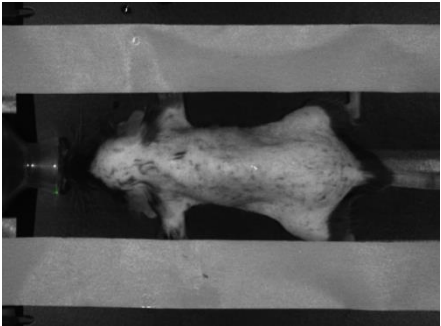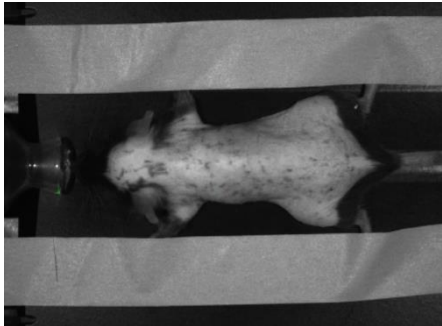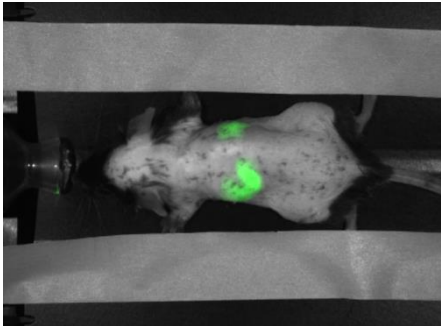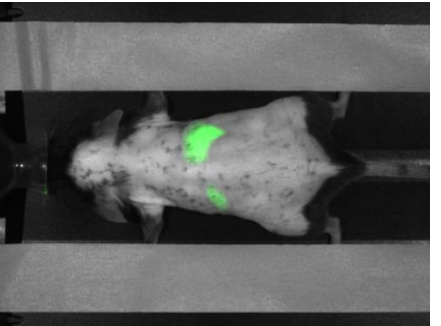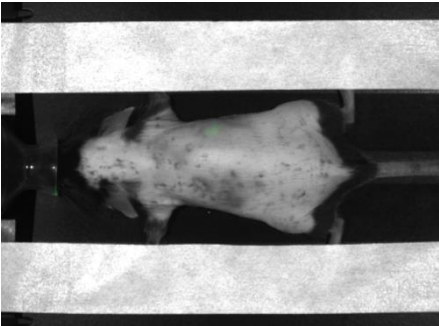

HIE3

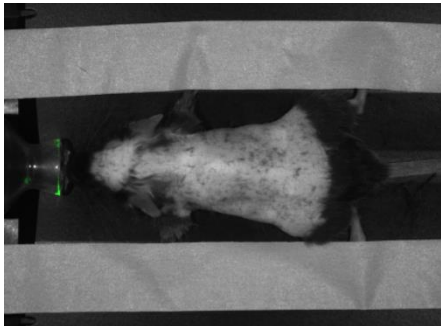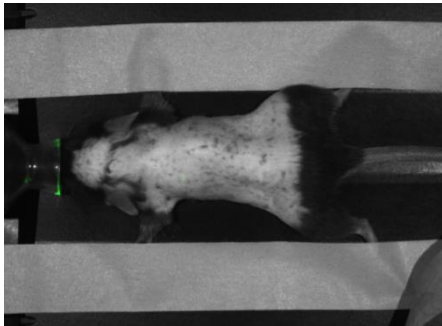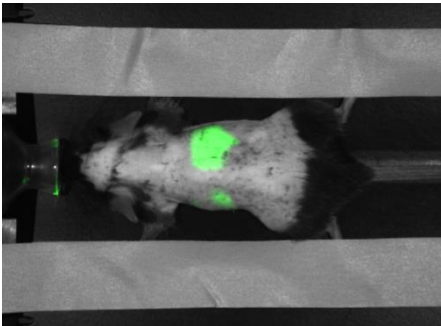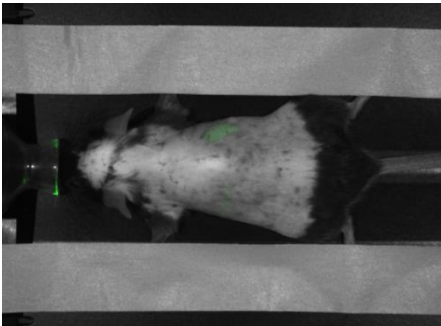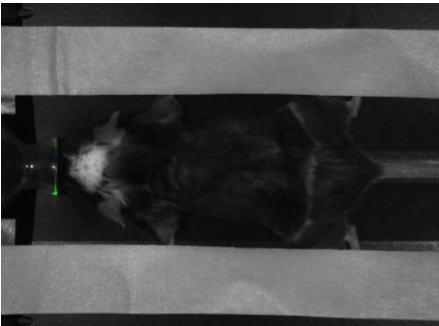



Prone position image (Brain) - HIE

0hr

1hr

1 day

7 day

14 day

HIE1

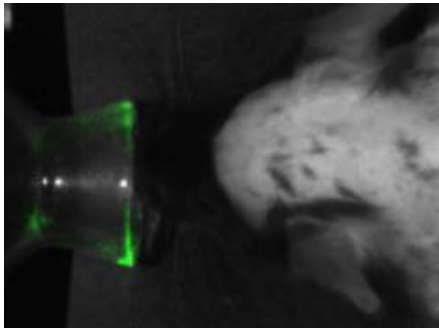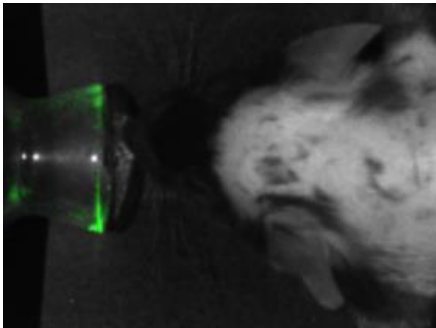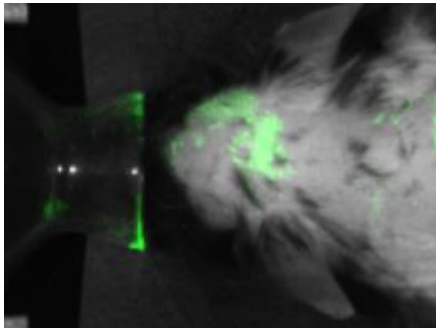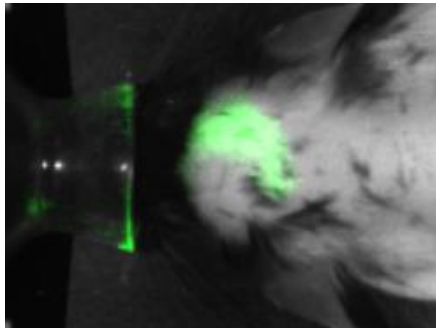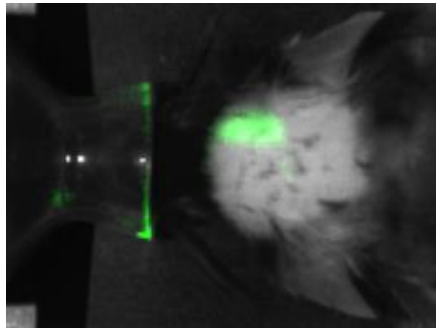

HIE2

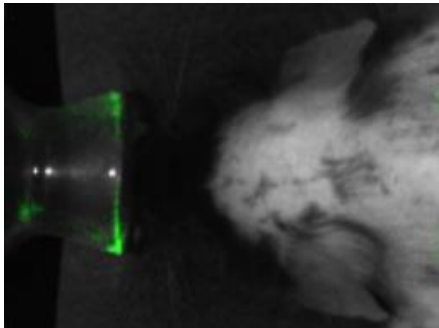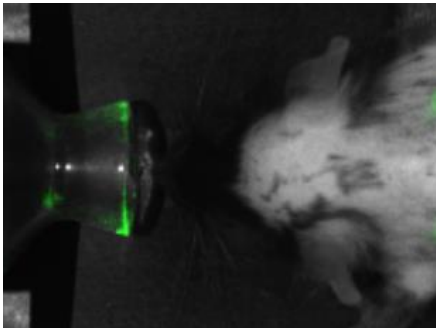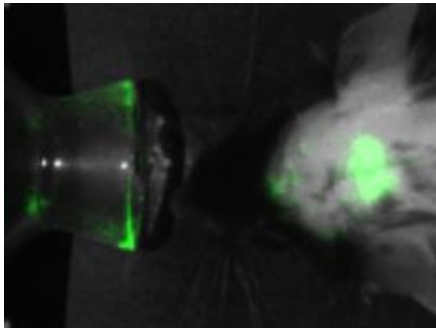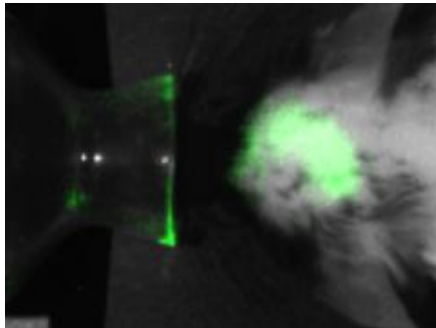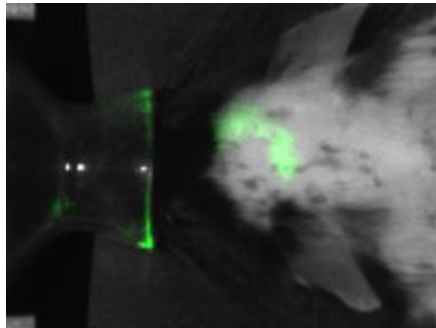

HIE3

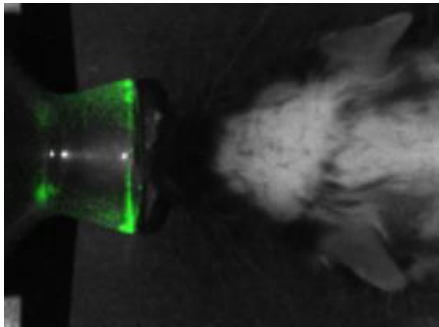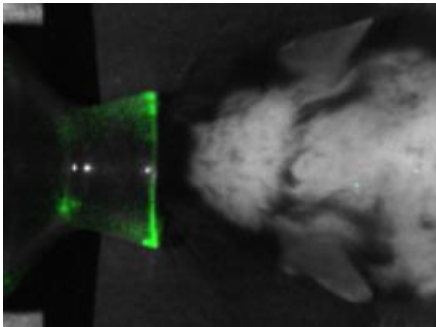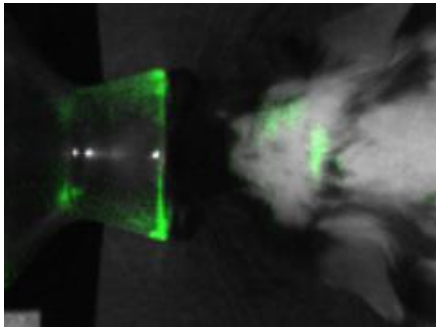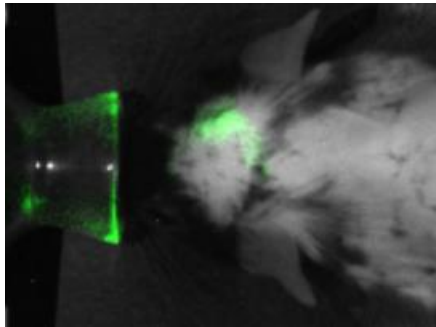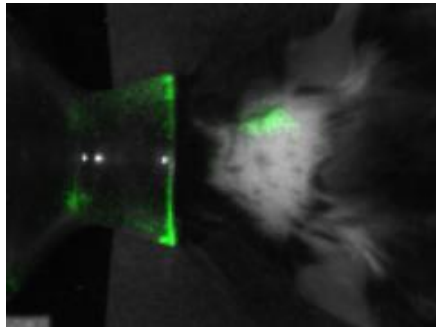

Supplement: s1 [file s1]
